# Supplementary material
Source: PubMed Central journal article supplement (PMC2938162)
Supplement: pp.110.158949_1.pdf [file pp.110.158949_1.pdf]

```
#This file contains small scripts required to run SNPscript.R I have found many of these functions are also useful for other analyses.
#This script was written in the R programming language to determine intervals of significant SNP density based on a bootstrap method.
#Required input for the script is a list of SNPs with chromosomal positions. Output of the script is similar to Figure 2 and Figure 3.
#Created on 04/06/10 by Andrew Severin andrewseverin@gmail.com
#Iowa State University
```

```
#####
#This function will give the index number in a matrix given the rowname.
IndexFromGeneCall<-function(inputmatrix,rowname){
  match(rowname,rownames(inputmatrix),nomatch=0)
}
```

```
#####
#plotting function
#this function will generate intervals of significant clustering of SNPs on soybean chromosomes scaled to the longest chromosome.
```

```
ChromosomePlot<-function(chromosomelength,intervalstart,intervalend,intervalheight,maxNumGenesInCluster,maxchromosomelength,binScales,currentBinScale,SNPcoords){
```

```
  #The axis labels require resizing depending on the width of the plot
  #the following is an estimate of the resizing required
  if (maxchromosomelength<750000){
    XcexVar<-1
  }
  if (maxchromosomelength>750000 & maxchromosomelength<12000000){
    XcexVar<-(-0.3125)*log(maxchromosomelength/1000000)+0.91
  }
  if (maxchromosomelength>12000000){
    XcexVar<-1
  }
}
```

```
#I make use of the rect function that has input as (xleft, ybottom, xright, ytop)
#keep in mind everything is scaled to Gm18, the largest chromosome
xleft=(1/maxchromosomelength)*intervalstart
ybottom=0
width=(intervalend-intervalstart)/maxchromosomelength
averagepos<-(intervalend+intervalstart)/(2*maxchromosomelength)
```

```
average<-(intervalend+intervalstart)/(2)
xright=xleft+width
ytop=intervalheight/maxNumGenesInCluster
rect(0,0,chromosomelength/maxchromosomelength,-0.04)
rect(SNPcoords/maxchromosomelength,0,SNPcoords/maxchromosomelength,-0.04,lwd=.1)
rect(xleft,ybottom,xright,ytop,border="black",col=rainbow(length(binScales))[which(binScales==currentBinScale)])
text(chromosomelength/(2*maxchromosomelength),-.02,labels=paste("chromosome",i),cex=.5)
text(SNPcoords/maxchromosomelength-2000/maxchromosomelength,-.02,labels=rownames(SNPcoords),cex=XcexVar,srt=90)
axis(1,tick=T,at=intervalstart/maxchromosomelength,labels=intervalstart,cex.axis=XcexVar,las = 2,lwd=.5)
axis(2,tick=T,at=seq(0,1,1/maxNumGenesInCluster),labels=0:maxNumGenesInCluster,cex.axis=.8)
```

```
#this draws the chromosome on the bottom
#this draws the location of each SNP
#Significant Intervals of SNPs
#chromosome name
#location of each Interval
#axis 1
#axis 2
```

```

ablineMulti<-function(i){abline(i,0,col="darkgrey",lwd=.1)}
sapply(seq(0,1,2/maxNumGenesInCluster),ablineMulti)
}

```

```

#Creates a grid at 2 SNP intervals
#sapply to create the grid

```

```
#####
```

```

#this function is not used in the SNPsript but is a handy little function.
#Used in a similar script for clustering genes.

```

```

identifyGenesOnChromosomeForSoybean<-function(GeneList){
  #this loop identifies all gene model names (glymas) on a specified chromosome
  if (i<10){
    glymas<-GeneList[grep(paste("0",i,"g",sep=""),GeneList)]
  }else{
    glymas<-GeneList[grep(paste(i,"g",sep=""),GeneList)]
  }
  return(glymas)
}

```

```

identifySNPSONChromosomeForSoybean<-function(snpList,chromosomeNumber){
  #this loop identifies all SNPs on a specified chromosome
  if (chromosomeNumber<10){
    snps<-snpList[grep(paste("Gm0",chromosomeNumber,sep=""),rownames(snpList)),]
  }else{
    snps<-snpList[grep(paste("Gm",chromosomeNumber,sep=""),rownames(snpList)),]
  }
  return(snps) #this will return the snp matrix that corresponds only to the chromosome of interest
}

```

```
#####
```

```

#this section will take the same number of genes and simulate how the genes will fall into the bins based on the 1000(or numofsims) random collections of genes

```

```

simulateData<-function(numofsims,AllGeneCalls,geneCoordinates,SNPS,chromosomeNumber){
  #matrix for storing simulations
  genesAll<-identifyGenesOnChromosomeForSoybean(AllGeneCalls)
  genesSample<-sample(genesAll,dim(SNPS)[1]*numofsims,replace=T)
  AllindexCoords<-function(i){IndexFromGeneCall(geneCoordinates,genesSample[i])}
  sampleIndex<-sapply(1:length(genesSample),AllindexCoords)
  genesSample<-matrix(genesSample,ncol=dim(SNPS)[1])
  sampleIndex<-matrix(sampleIndex,ncol=dim(SNPS)[1])
  return(list(genesSample=genesSample,sampleIndex=sampleIndex))
}

```

```
#####
```

```

#Bootstrap function for clustering on a chromosome

```

```

#generation of the bin sizes across the chromosome

```

```

clusterByBootstrap<-function(chromosomelength,binsize,geneIndexValues,SNPCoordinates,AllGeneCalls,numofsims,bootData){
  print(SNPCoordinates)
  numBins<-floor(chromosomelength/binsize)
}

```

```

#this section will calculate how many of the SNPs we are interested in fall into each bin
breaks1<-seq(0,chromosomelength,binsize)
chromBinsFind<-findInterval(SNPCoordinates,breaks1, rightmost.closed=T)

chromBins<-hist(chromBinsFind,breaks=seq(0,length(breaks1),1),plot=F)$counts
print(chromBins)
sampleIndex<-bootData$sampleIndex                                #actual data

chromBinsSample<-matrix(0,numofsims,length(breaks1))              #simulated data
  for (j in 1:numofsims){
    #generation of the bin sizes across the chromosome for the simulated data
    breaks1<-seq(0,chromosomelength,binsize)
    chromBinsSam<-findInterval(geneCoordinatesAve[sampleIndex[j,]],breaks1, rightmost.closed=T)
    chromBinsSample[j,]<-hist(chromBinsSam,breaks=seq(0,length(breaks1),1),plot=F)$counts
  }
  #Average and standard deviation of the simulated data
  chrombinsAve<-colMeans(chromBinsSample)
  chrombinsSD<-sd(chromBinsSample)

#this section is the determination of the bins that are significant
over3stddev<-which((chromBins-(chrombinsAve+3*chrombinsSD))>0)
over3stddevBy<-(chromBins-(chrombinsAve+3*chrombinsSD))[over3stddev]
over3stddevZscore<-round(((chromBins-(chrombinsAve))[over3stddev])/chrombinsSD[over3stddev],2)

#this if statement is required in case no intervals are found to be significant

if (length(over3stddev)==0){
  print("No significant intervals found")
  return(0)
}else{
  significantIntervals<-matrix(c(breaks1[over3stddev],breaks1[over3stddev]+binsize),length(over3stddev),2)
}

#append number of genes in the bin and the zscore to significantIntervals
significantIntervals<-matrix(cbind(significantIntervals,chromBins[over3stddev],over3stddevZscore),ncol=4)
significantIntervals<-matrix(significantIntervals[sort(significantIntervals[,1],index.return=T)$ix,],ncol=4)
significantIntervals<-matrix(significantIntervals[which(significantIntervals[,3]>1),],ncol=4)

print(significantIntervals)
if(dim(significantIntervals)[1]==0){
  return(0)}else{
  return(significantIntervals)
}
}

```

```
#This script is used to cluster SNPs onto Soybean chromosomes. Requires SNPsource.R and .RDataSNP
#This script was written in the R programming language to determine intervals of significant SNP density based on a bootstrap method.
#Required input for the script is a list of SNPs with chromosomal positions. Output of the script is similar to Figure 2 and Figure 3.
#Created on 04/06/10 by Andrew Severin andrewseverin@gmail.com
#Iowa State University
```

```
#required libraries
```

```
library(gplots)
source('SNPsource.R')
load(".RDataSNP")
```

```
#starting parameters
```

```
dir<-"./"
numofsims<-3
SNPsofInterest<-read.table('./exampleSNPsFile.txt')      #list with SNPs of interest
numberOfChromosome<-20                                #this variable will allow you to loop through the first X chromosomes (see for loop below)
```

```
#this section is optional if you would like to have multiple bin sizes uncomment
```

```
#StartingBinsize<-6000000                                #important the the vector in this forloop results in binsizes that include the binsizes before it
#binscales<-c(1,2,6,12,60,120)                          #for binsize 6M 3M 1M 500K 100K 50k
```

```
#For multiple bin sizes comment out this block of code
```

```
StartingBinsize<-500000                                #Here I chose just one binsize
binscales<-c(1)
```

```
#variables calculated from the input parameters
```

```
geneCoordinatesAve<-matrix(round((geneCoordinates[,3]+geneCoordinates[,4])/2),ncol=1)
rownames(geneCoordinatesAve)<-rownames(geneCoordinates)
chromosomelengthAll<-chrom[,4]
maxchromosomelength<-max(chrom[,4])
significantIntervalsOrig<-0
```

```
#this for loop will cycle through each chromosomes.
```

```
for (i in 1:numberOfChromosome){
  #for (i in numberOfChromosome:numberOfChromosome){      #This line can be uncommented if you want to run it on a specific chromosome
    dir.create(paste("./",i,sep=""))                       #create directory to export outfiles
    chromosomelength<-chromosomelengthAll[i]
```

```
maxNumGenesInCluster<-0                                #initiate a variable that will be needed later for plotting
SNPs<-identifySNPSONChromosomeForSoybean(SNPsofInterest,i) #this function will identify the SNPs on each chromosome as it goes through the loop
```

```
if (dim(SNPs)[1]<3){                                     #No need to look at chromosomes that do not have at least 3 SNPs
  print(SNPs)
```

```

next()
}

bootData<-simulateData(numofsims,AllGeneCalls,geneCoordinates,SNPs,i)           #generate the simulated data (See SNPsource for code)

#binSize (for loop) will cycle through the binsizes determined above
for (b in binscales){

  binsize<-StartingBinsize/b
  print(binsize)
  appendtofilename<-paste("_",binsize/binscales,sep="")           #this variable is used for the outputfiles to distinguish between bins
  SNPcoords<-SNPs[,1]                                           #for retrieval of the coordinates of the SNPs of interest

#function to do bootstrap method
significantIntervals<-clusterByBootstrap(chromosomelength,binsize,geneCoordinatesAve,SNPcoords,AllGeneCalls,numofsims,bootData)
print(significantIntervals)

  if (b==binscales[1]){
    #open a pdf file
    pdf(file=paste(i,"/chrom",i,"ALL", ".pdf",sep=""),paper="special",height=7,width=100)
    plot(0:1, 0:1, type="n", axes=FALSE, ann=FALSE)
  }
#if there are no significant Intervals go to the next binsize in the loop

  if(significantIntervals==0){
    next
  }
#This block estimates the required Y dimension for plotting and works for most cases
  if (maxNumGenesInCluster==0){
    maxNumGenesInCluster<-max(significantIntervals[,3])+1
  }

#required input variables for the plotting function. ChromosomePlot can be found in SNPsource.
  intervalstart<-significantIntervals[,1]
  intervalend<-significantIntervals[,2]
  intervalheight<-significantIntervals[,3]
  currentBinScale<-b
  ChromosomePlot(chromosomelength,intervalstart,intervalend,intervalheight,maxNumGenesInCluster,maxchromosomelength, binScales, currentBinScale,SNPcoords)

  if(b==binscales[length(binscales)]){
    #now that the plotting is finished, close the pdf file
    dev.off()
  }
}

```

```
#write to file gene lists with intervals that are significant  
colnames(significantIntervals)<-c('intervalstart','intervalend','numberInInterval','ZscoreaboveBootstrap')  
write.table(significantIntervals,file=paste(i,"/clusterTable",i,appendtofilename,".txt",sep=""),append=T,quote=F,col.names=T)
```

```
}
```

```
#this commands save the R sessions for each chromosome into each chromosome folder respectively.  
save.image(file = paste(i,"/RData",i,sep=""))
```

```
}
```

#the two columns are identical required to read in as a table in the script

position position

Gm01\_53617124 53617124 53617124  
Gm02\_5687687 5687687 5687687  
Gm02\_42350182 42350182 42350182  
Gm03\_36460374 36460374 36460374  
Gm03\_36554101 36554101 36554101  
Gm03\_36559857 36559857 36559857  
Gm03\_36559926 36559926 36559926  
Gm03\_36560002 36560002 36560002  
Gm03\_36952394 36952394 36952394  
Gm03\_36959955 36959955 36959955  
Gm03\_36996777 36996777 36996777  
Gm03\_36997184 36997184 36997184  
Gm03\_36997185 36997185 36997185  
Gm03\_37024958 37024958 37024958  
Gm03\_37027198 37027198 37027198  
Gm03\_37144398 37144398 37144398  
Gm03\_37165409 37165409 37165409  
Gm03\_37827399 37827399 37827399  
Gm03\_37828684 37828684 37828684  
Gm03\_37828791 37828791 37828791  
Gm03\_37832228 37832228 37832228  
Gm03\_37863675 37863675 37863675  
Gm03\_38065066 38065066 38065066  
Gm03\_38083417 38083417 38083417  
Gm03\_38117453 38117453 38117453  
Gm03\_38117485 38117485 38117485  
Gm03\_38132996 38132996 38132996  
Gm03\_38136913 38136913 38136913  
Gm03\_38170431 38170431 38170431  
Gm03\_38173719 38173719 38173719  
Gm03\_38173815 38173815 38173815  
Gm03\_38174150 38174150 38174150  
Gm03\_38174157 38174157 38174157  
Gm03\_38718231 38718231 38718231  
Gm03\_38718672 38718672 38718672  
Gm03\_38942920 38942920 38942920  
Gm03\_38942927 38942927 38942927  
Gm03\_39788794 39788794 39788794  
Gm03\_39788799 39788799 39788799  
Gm03\_39790874 39790874 39790874

Gm03\_39795164 39795164 39795164  
Gm03\_39795203 39795203 39795203  
Gm03\_39964048 39964048 39964048  
Gm03\_39966061 39966061 39966061  
Gm03\_39967974 39967974 39967974  
Gm03\_39986148 39986148 39986148  
Gm03\_39993121 39993121 39993121  
Gm03\_40055679 40055679 40055679  
Gm03\_40056070 40056070 40056070  
Gm03\_40131229 40131229 40131229  
Gm03\_40131350 40131350 40131350  
Gm03\_40132046 40132046 40132046  
Gm03\_40154304 40154304 40154304  
Gm03\_40154315 40154315 40154315  
Gm03\_40160427 40160427 40160427  
Gm03\_40172340 40172340 40172340  
Gm03\_40179701 40179701 40179701  
Gm03\_40211426 40211426 40211426  
Gm03\_40371846 40371846 40371846  
Gm03\_40459321 40459321 40459321  
Gm03\_40462434 40462434 40462434  
Gm03\_40462640 40462640 40462640  
Gm03\_40585266 40585266 40585266  
Gm03\_40585499 40585499 40585499  
Gm03\_40586108 40586108 40586108  
Gm03\_40587775 40587775 40587775  
Gm03\_40600203 40600203 40600203  
Gm03\_40600256 40600256 40600256  
Gm03\_40603941 40603941 40603941  
Gm03\_40628097 40628097 40628097  
Gm03\_40656449 40656449 40656449  
Gm03\_40676583 40676583 40676583  
Gm03\_40676856 40676856 40676856  
Gm03\_40678154 40678154 40678154  
Gm03\_40683015 40683015 40683015  
Gm03\_40685721 40685721 40685721  
Gm03\_40785291 40785291 40785291  
Gm03\_40785299 40785299 40785299  
Gm03\_40823593 40823593 40823593  
Gm03\_40874888 40874888 40874888  
Gm03\_40886333 40886333 40886333  
Gm03\_40889026 40889026 40889026  
Gm03\_40906651 40906651 40906651



Gm03\_41007691 41007691 41007691  
Gm03\_41007937 41007937 41007937  
Gm03\_41008255 41008255 41008255  
Gm03\_41008442 41008442 41008442  
Gm03\_41008459 41008459 41008459  
Gm03\_41171468 41171468 41171468  
Gm03\_41185505 41185505 41185505  
Gm03\_41223681 41223681 41223681  
Gm03\_41228284 41228284 41228284  
Gm03\_41228321 41228321 41228321  
Gm03\_41234338 41234338 41234338  
Gm03\_41274006 41274006 41274006  
Gm03\_41275788 41275788 41275788  
Gm03\_41982791 41982791 41982791  
Gm03\_42142835 42142835 42142835  
Gm03\_42179147 42179147 42179147  
Gm03\_42224757 42224757 42224757  
Gm03\_42224778 42224778 42224778  
Gm03\_42243466 42243466 42243466  
Gm03\_42243699 42243699 42243699  
Gm03\_42672131 42672131 42672131  
Gm03\_45026222 45026222 45026222  
Gm03\_45416367 45416367 45416367  
Gm03\_45503654 45503654 45503654  
Gm03\_45516926 45516926 45516926  
Gm04\_44787569 44787569 44787569  
Gm04\_45061509 45061509 45061509  
Gm04\_45090419 45090419 45090419  
Gm04\_45152573 45152573 45152573  
Gm04\_45157974 45157974 45157974  
Gm04\_45380790 45380790 45380790  
Gm04\_45594453 45594453 45594453  
Gm05\_38251772 38251772 38251772  
Gm05\_38278658 38278658 38278658  
Gm05\_38279366 38279366 38279366  
Gm05\_38280387 38280387 38280387  
Gm05\_38337295 38337295 38337295  
Gm05\_38402327 38402327 38402327  
Gm05\_38432746 38432746 38432746  
Gm05\_38433427 38433427 38433427  
Gm05\_38433580 38433580 38433580  
Gm05\_38589019 38589019 38589019  
Gm05\_38596037 38596037 38596037

Gm05\_38913395 38913395 38913395  
Gm05\_38913666 38913666 38913666  
Gm05\_39082457 39082457 39082457  
Gm05\_39082469 39082469 39082469  
Gm06\_5721969 5721969 5721969  
Gm06\_5721970 5721970 5721970  
Gm08\_3461787 3461787 3461787  
Gm09\_6112681 6112681 6112681  
Gm10\_38131569 38131569 38131569  
Gm10\_38131571 38131571 38131571  
Gm10\_47783606 47783606 47783606  
Gm12\_3862466 3862466 3862466  
Gm12\_38459068 38459068 38459068  
Gm13\_35524268 35524268 35524268  
Gm13\_35617464 35617464 35617464  
Gm13\_35823484 35823484 35823484  
Gm13\_35823512 35823512 35823512  
Gm13\_35823533 35823533 35823533  
Gm13\_35823811 35823811 35823811  
Gm13\_35835159 35835159 35835159  
Gm13\_35862124 35862124 35862124  
Gm13\_35862205 35862205 35862205  
Gm13\_39517326 39517326 39517326  
Gm14\_28088505 28088505 28088505  
Gm15\_3100509 3100509 3100509  
Gm16\_30464934 30464934 30464934  
Gm16\_30479527 30479527 30479527  
Gm16\_30539483 30539483 30539483  
Gm16\_30539518 30539518 30539518  
Gm16\_30539519 30539519 30539519  
Gm16\_30626524 30626524 30626524  
Gm16\_31191863 31191863 31191863  
Gm16\_31204160 31204160 31204160  
Gm16\_31204451 31204451 31204451  
Gm16\_31225684 31225684 31225684  
Gm16\_31461554 31461554 31461554  
Gm16\_31475163 31475163 31475163  
Gm16\_31476359 31476359 31476359  
Gm16\_31827645 31827645 31827645  
Gm16\_31827884 31827884 31827884  
Gm16\_31827991 31827991 31827991  
Gm16\_31828137 31828137 31828137  
Gm16\_31829738 31829738 31829738

Gm16\_31840753 31840753 31840753

Gm16\_31840819 31840819 31840819

Gm16\_31842815 31842815 31842815
